# Supplementary material for: Phylogeny of Myzostomida (Annelida) and their relationships with echinoderm hosts
Source: PubMed Central journal article supplement (PMC4160548; doi:10.1186/s12862-014-0170-7), 2014-08-28
Supplement: 12862_2014_170_MOESM1_ESM.pdf [file 12862_2014_170_MOESM1_ESM.pdf]

**Figure S1. Maximum parsimony phylogeny of Myzostomida.** Maximum parsimony (MP) consensus tree of 12 most parsimonious trees (length = 10589) inferred from the concatenated four-gene dataset; all positions included with non-myzostomid annelid outgroup. Numbers and symbols near nodes refer to jackknife (JK) support scores. An asterisk indicates nodes with >90% support. Unlabeled nodes are those not recovered in jackknife analyses. Specific names written in plain text are for species described in a separate publication – Summers & Rouse, *in review*. These names are disclaimed for nomenclatural purposes under ICZN 8.3 and are not made available through this publication.

**Figure S2. Maximum likelihood transformations for number of hosts.** Numbers and symbols near nodes refer to proportional likelihood estimations. An asterisk indicates nodes with an estimated proportional likelihood of >95%. Other scores provided in order of most likely states and separated by a forward slash when applicable. See Figure S1 regarding non-italicized names.

**Figure S3. Maximum likelihood phylogeny of Myzostomida.** Maximum likelihood (ML) tree (-ln = 47532) inferred from the concatenated four-gene dataset; all positions included with non-myzostomid annelid outgroup. Numbers and symbols near nodes refer to bootstrap (BS) support scores. An asterisk indicates nodes with >90% support. See Figure S1 regarding non-italicized names.

Figure S1. Maximum parsimony phylogeny of Myzostomida.

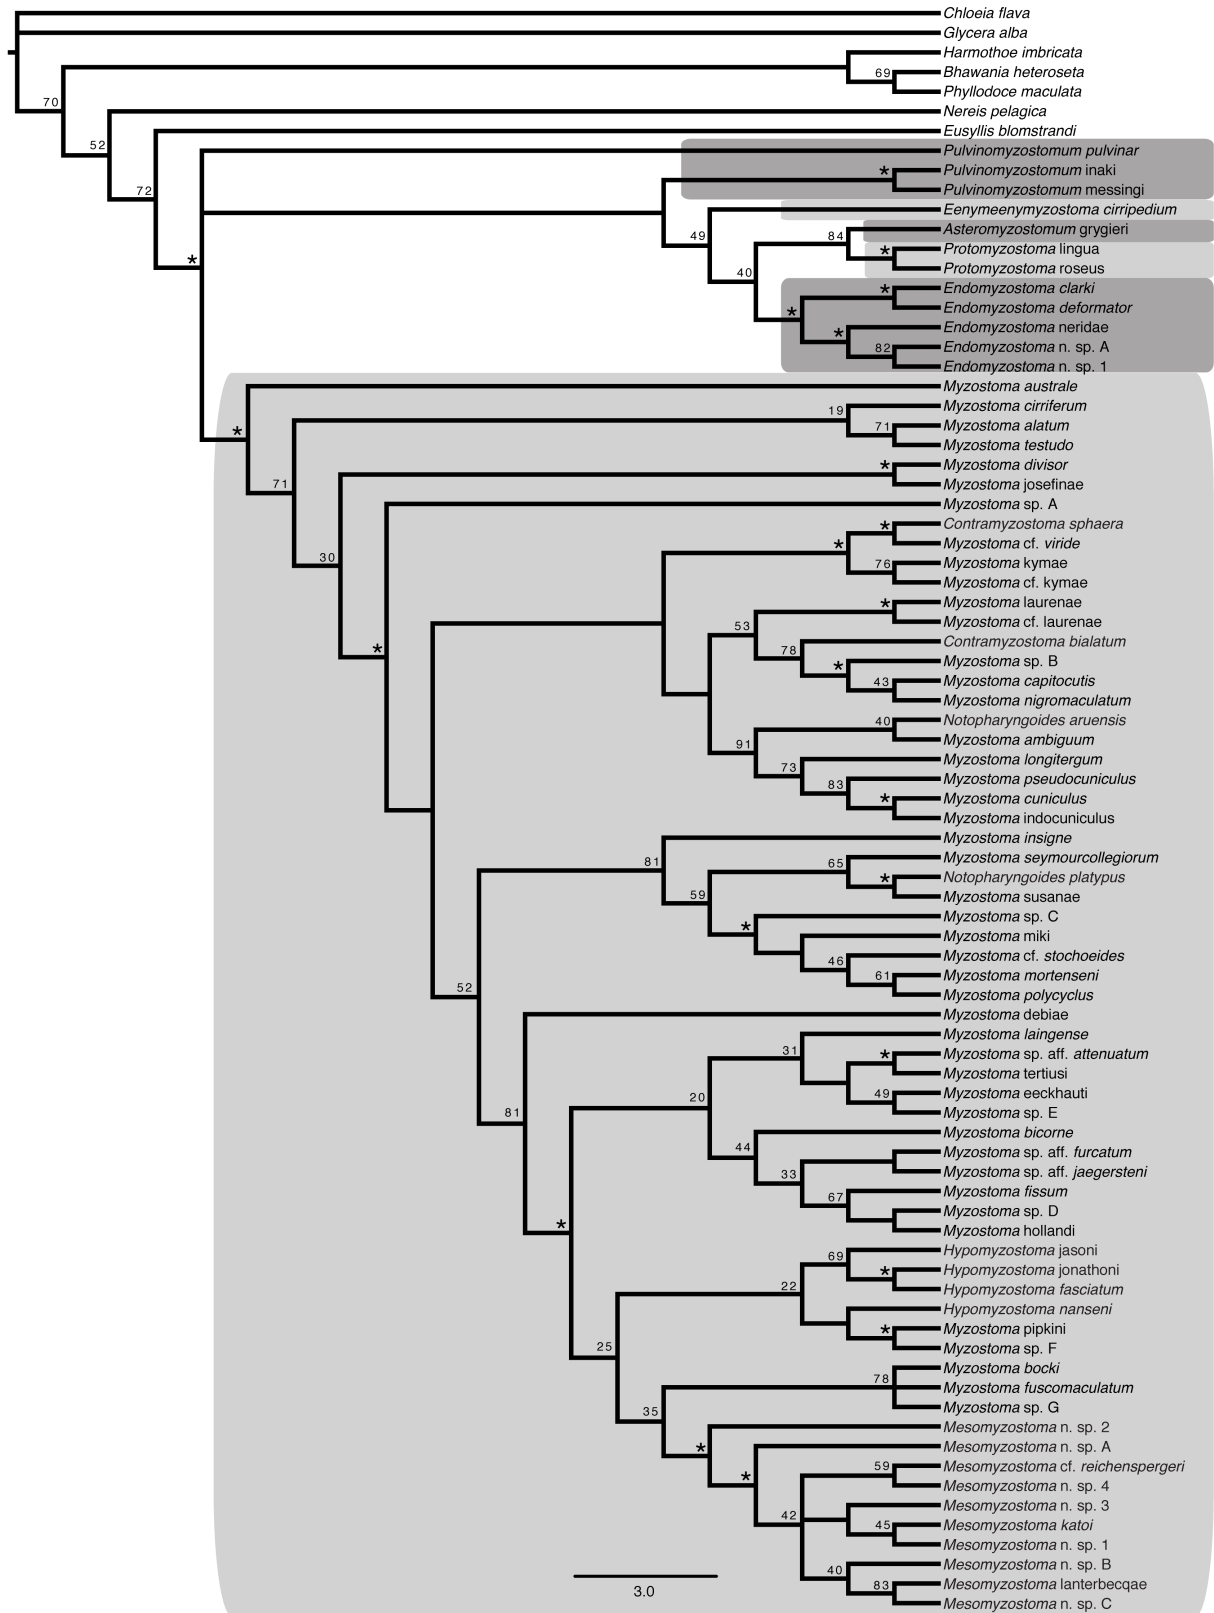

Figure S2. Maximum likelihood transformations for number of hosts.

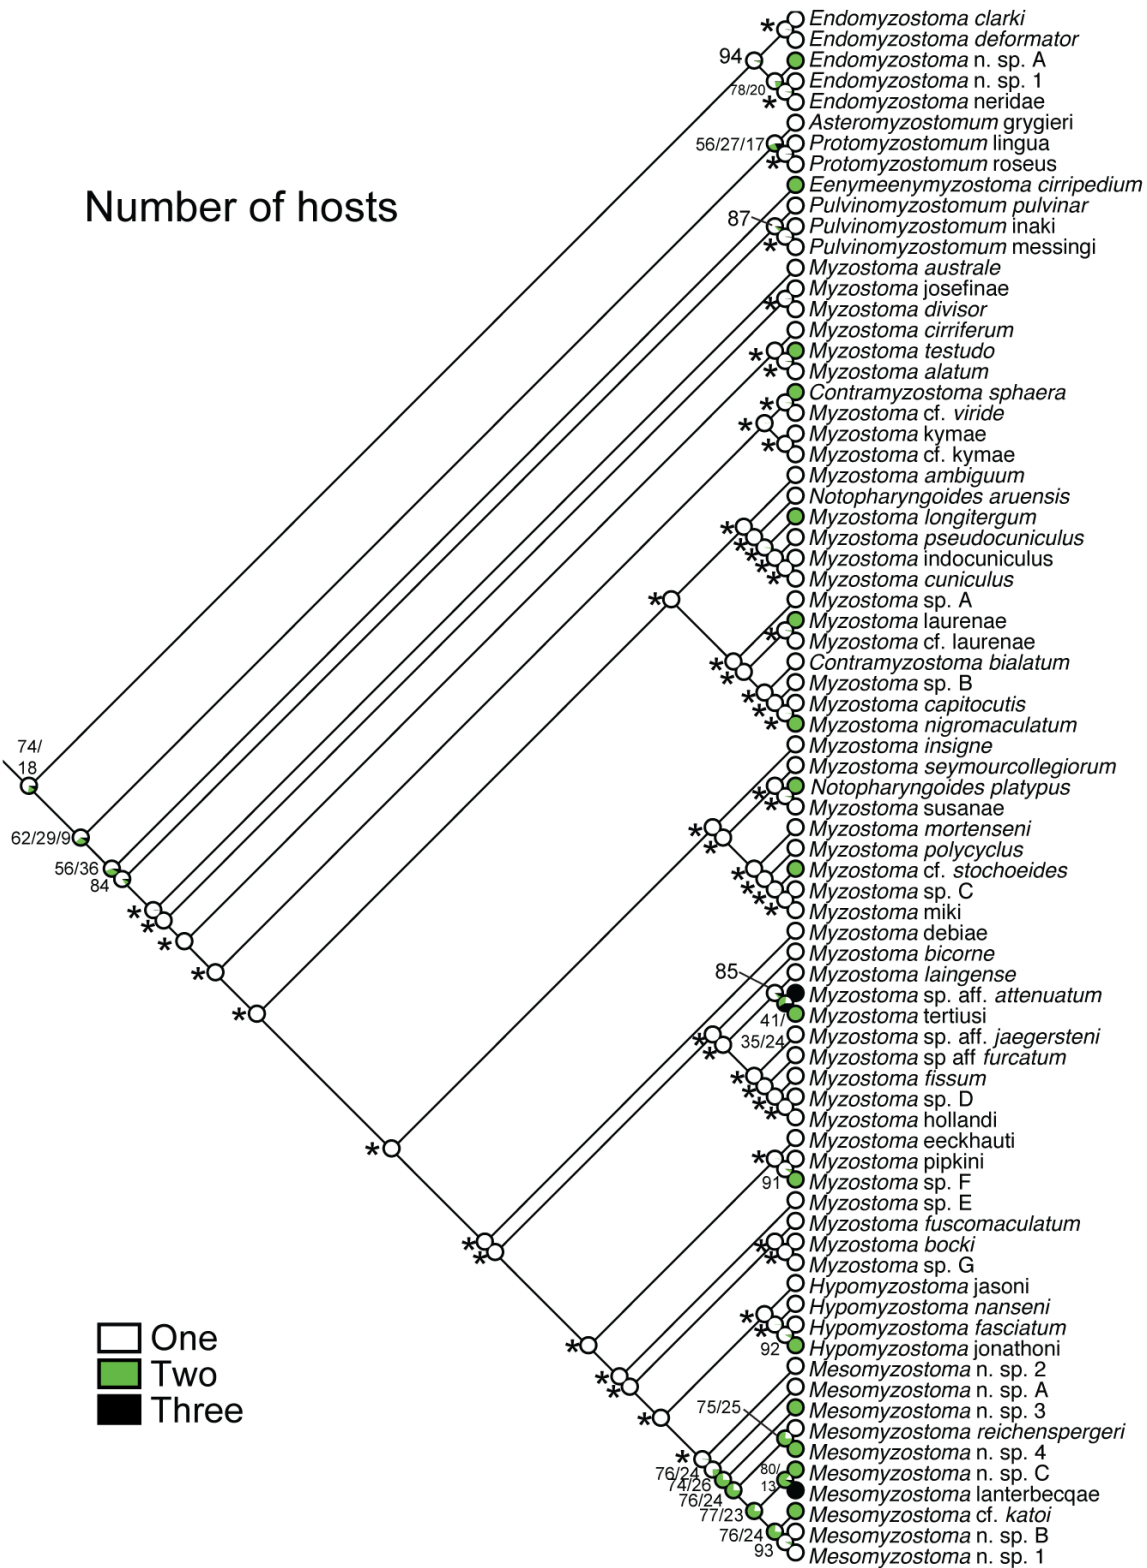

Figure S3. Maximum likelihood phylogeny of Myzostomida.

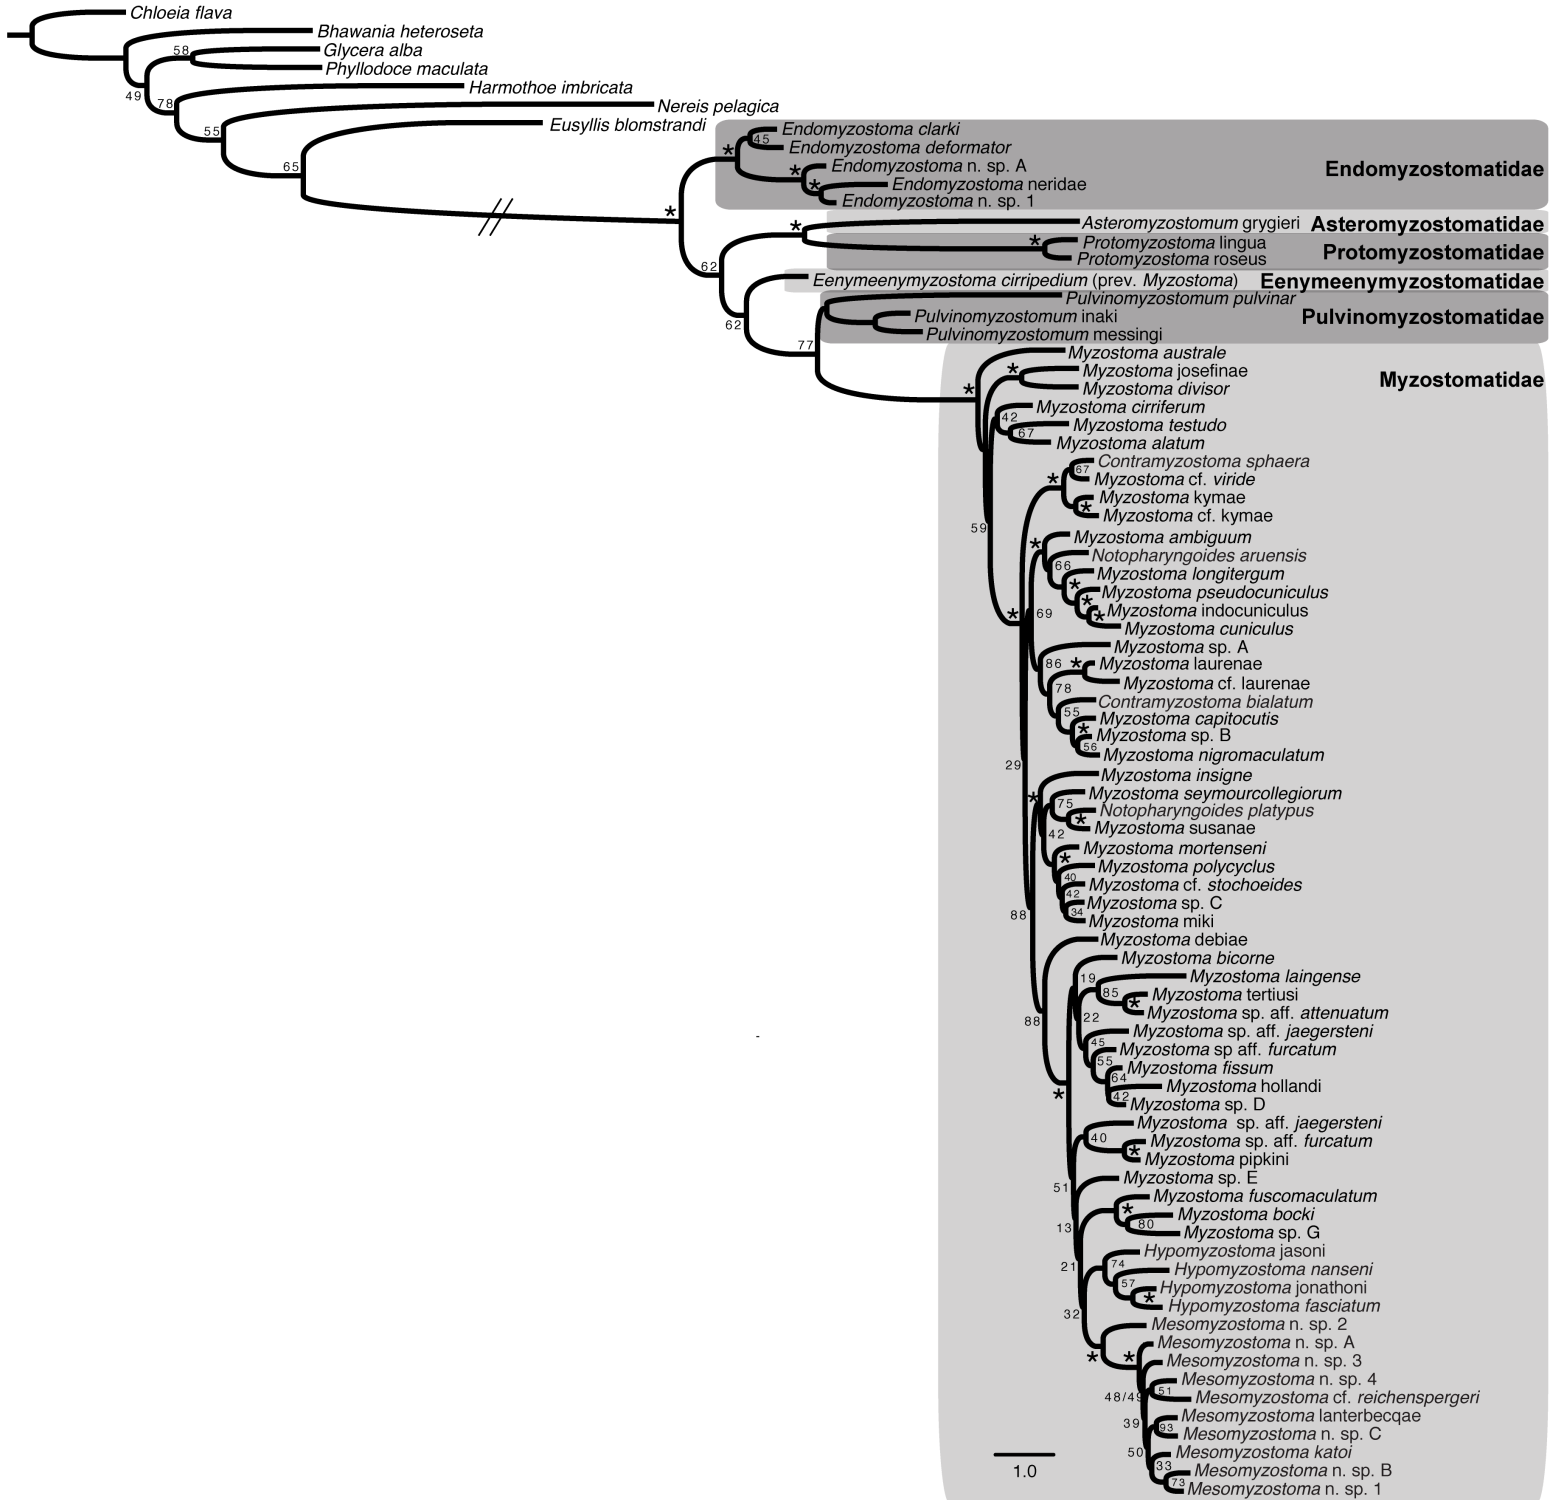

**Table S1. Myzostome specimens.** Collection localities, voucher information, and GenBank accession numbers for specimens used in molecular analyses. Host information only for specimens collected in this study. New sequences are in bold. Asterisks for DNA subsample only. Specific names written in plain text are for species described in a separate publication – (Summers & Rouse, *in review*). These names are disclaimed for nomenclatural purposes under ICZN 8.3 and are not made available through this publication. Mesomyzostoma sp. 1-4 are being described in Eeckhaut et al. *in prep*.

| Myzostome Taxa                                 | Voucher Accession | Host(s)                                                                       | Lifestyle   | Location                                 | COI             | 16S             | 18S             | H3              |
|------------------------------------------------|-------------------|-------------------------------------------------------------------------------|-------------|------------------------------------------|-----------------|-----------------|-----------------|-----------------|
| <b>Asteriomyzostomatidae</b> Jägersten, 1940   |                   |                                                                               |             |                                          |                 |                 |                 |                 |
| <i>Asteromyzostomum grygieri</i>               | SIO-BIC A3801     | <i>Labidiaster annulatus</i>                                                  | Internal    | Elephant Island, Antarctica              | <b>KM014170</b> | -               | <b>KM014252</b> | <b>KM014295</b> |
| <b>Eenymeenymyzostomatidae</b> Summers & Rouse |                   |                                                                               |             |                                          |                 |                 |                 |                 |
| <i>Eenymeenymyzostoma cirripedium</i>          | SAM E3404         | <i>Metacrinus rotundus</i> (also <i>Metacrinus levii</i> )                    | Free-living | Suruga Bay, Japan                        | DQ238191        | DQ238162        | DQ238127        | -               |
| <b>Endomyzostomatidae</b> Perrier, 1897        |                   |                                                                               |             |                                          |                 |                 |                 |                 |
| <i>Endomyzostoma clarki</i>                    | SAM E3400         | <i>Metacrinus</i> cf. <i>rotundus</i>                                         | In galls    | Japan Sea                                | DQ238188        | DQ238159        | AF260588        | -               |
| <i>Endomyzostoma deformatum</i>                | SAM E3401         | <i>Endoxocrinus parrae</i>                                                    | In galls    | Philippines                              | DQ238190        | DQ238161        | DQ238126        | -               |
| <i>Endomyzostoma neridae</i>                   | AM W.43447        | <i>Cenometra bella</i>                                                        | In cysts    | Dili, Banda Sea, East Timor              | <b>KM014169</b> | <b>KM014214</b> | <b>KM014251</b> | <b>KM014294</b> |
| <i>Endomyzostoma</i> n. sp. 1                  | SAM E3402         | Comatulidae sp.                                                               | In cysts    | Toliara, Mozambique Channel, Madagascar  | DQ238193        | DQ238164        | DQ238129        | -               |
| <i>Endomyzostoma</i> n. sp. A                  | SIO-BIC A3242     | <i>Florometra mawsoni</i> (also possibly <i>Promachocrinus kerguelensis</i> ) | In cysts    | South Orkneys, Antarctica                | <b>KM014168</b> | <b>KM014213</b> | <b>KM014250</b> | <b>KM014293</b> |
| <b>Myzostomatidae</b> Beard, 1884              |                   |                                                                               |             |                                          |                 |                 |                 |                 |
| <i>Contramyzostoma bialatum</i>                | SIO-BIC A3685     | <i>Phanogenia typica</i>                                                      | Free-living | Madang, Bismarck Sea, Papua New Guinea   | -               | <b>KM014219</b> | <b>KM014257</b> | <b>KM014299</b> |
| <i>Contramyzostoma sphaera</i>                 | ?/ SIO-BIC A3654  | <i>Comatella nigra</i> type A; (also <i>Comatella nigra</i> type B)           | In cysts    | Bismarck Sea, Papua New Guinea           | DQ238187        | <b>KM014220</b> | AF260586        | <b>KM014300</b> |
| <i>Hypomyzostoma fasciatum</i>                 | SAM E3396         | <i>Himerometra robustipinna</i>                                               | Free-living | Lizard Island Reef, Coral Sea, Australia | DQ238195        | DQ238166        | DQ238131        | -               |

Summers MM & Rouse GW (2014) Phylogeny of Myzostomida (Annelida) and their relationships with echinoderm hosts. *BMC Evolutionary Biology*.

|                                                 |                         |                                                                                                           |             |                                            |                 |                 |                 |                 |
|-------------------------------------------------|-------------------------|-----------------------------------------------------------------------------------------------------------|-------------|--------------------------------------------|-----------------|-----------------|-----------------|-----------------|
| <i>Hypomyzostoma jasoni</i>                     | SAM E3398               | <i>Stephanometra indica</i>                                                                               | Free-living | Lizard Island Reef, Coral Sea, Australia   | DQ238134        | DQ238169        | DQ238198        | -               |
| <i>Hypomyzostoma jonathoni</i>                  | SAM E3397               | <i>Dichrometra/Lamprometra/Liparometra</i> sp. 4; (also <i>Dichrometra/Lamprometra/Liparometra</i> sp. 1) | Free-living | Lizard Island Reef, Coral Sea, Australia   | DQ238197        | DQ238168        | DQ238133        | -               |
| <i>Hypomyzostoma nanseni</i>                    | SIO-BIC A3759           | <i>Basilometra boschmai</i>                                                                               | Free-living | Raja Ampat, Indonesia                      | <b>KM014183</b> | -               | <b>KM014267</b> | -               |
| <i>Mesomyzostoma</i> cf. <i>katoi</i>           | SIO-BIC A3689           | <i>Anneissia bennetti</i> ; (also <i>Anneissia japonica</i> )                                             | Internal    | Madang, Bismarck Sea, Papua New Guinea     | <b>KM014175</b> | <b>KM014221</b> | <b>KM014258</b> | <b>KM014301</b> |
| <i>Mesomyzostoma lanterbecqae</i>               | SIO-BIC A3651           | <i>Clarkcomanthus alternans</i> ; (also <i>Clarkcomanthus mirabilis</i> ; <i>Comatella nigra</i> type A)  | Internal    | Madang, Bismarck Sea, Papua New Guinea     | <b>KM014177</b> | <b>KM014223</b> | <b>KM014260</b> | -               |
| <i>Mesomyzostoma</i> cf. <i>reichenspergeri</i> | SAM E3410/SIO-BIC A3680 | <i>Himerometra robustipinna</i>                                                                           | Internal    | Lizard Island Reef, Coral Sea, Australia   | DQ238182        | DQ238152        | DQ238116        | <b>KM014302</b> |
| <i>Mesomyzostoma</i> n. sp. 1                   | SAM E3412               | <i>Clarkcomanthus albinotus</i>                                                                           | Internal    | Lizard Island Reef, Coral Sea, Australia   | -               | DQ238157        | DQ238122        | -               |
| <i>Mesomyzostoma</i> n. sp. 2                   | SAM E3406               | <i>Anneissia japonica</i>                                                                                 | Internal    | Japan Sea, Japan                           | DQ238186        | DQ238156        | DQ238120        | -               |
| <i>Mesomyzostoma</i> n. sp. 3                   | SAM E3409               | <i>Comaster schlegelii</i> (also <i>Comaster audax</i> )                                                  | Internal    | Lizard Island Reef, Coral Sea, Australia   | DQ238183        | DQ238153        | DQ238117        | -               |
| <i>Mesomyzostoma</i> n. sp. 4                   | SAM E3408               | <i>Dichrometra/Lamprometra/Liparometra</i> sp. 1; (also <i>Dichrometra/Lamprometra/Liparometra</i> sp. 4) | Internal    | Lizard Island Reef, Coral Sea, Australia   | DQ238184        | DQ238154        | DQ238118        | -               |
| <i>Mesomyzostoma</i> n. sp. A                   | -                       | <i>Clarkcomanthus albinotus</i>                                                                           | Internal    | Madang, Bismarck Sea, Papua New Guinea     | <b>KM014176</b> | <b>KM014222</b> | <b>KM014259</b> | <b>KM014303</b> |
| <i>Mesomyzostoma</i> n. sp. B                   | -                       | <i>Comanthus</i> cf. <i>suavia</i>                                                                        | Internal    | Raja Ampat, Indonesia                      | <b>KM014178</b> | -               | <b>KM014261</b> | -               |
| <i>Mesomyzostoma</i> n. sp. C                   | SIO-BIC A3762           | <i>Clarkcomanthus alternans</i> ; (also <i>Clarkcomanthus albinotus</i> )                                 | Internal    | Raja Ampat, Indonesia                      | <b>KM014179</b> | <b>KM014224</b> | <b>KM014262</b> | <b>KM014304</b> |
| <i>Myzostoma alatum</i>                         | ?                       | <i>Leptometra phalangium</i>                                                                              | Free-living | Banyuls-sur-Mer, Mediterranean Sea, France | DQ238200        | DQ238171        | DQ238135        | -               |

Summers MM & Rouse GW (2014) Phylogeny of Myzostomida (Annelida) and their relationships with echinoderm hosts. *BMC Evolutionary Biology*.

|                                           |                               |                                                                                                      |             |                                                                   |                 |                 |                 |                 |
|-------------------------------------------|-------------------------------|------------------------------------------------------------------------------------------------------|-------------|-------------------------------------------------------------------|-----------------|-----------------|-----------------|-----------------|
| <i>Myzostoma ambiguum</i>                 | AM W.43456<br>/?              | <i>Anneissia bennetti</i>                                                                            | Free-living | Bismarck Sea, Papua New Guinea (18S); Dili, Banda Sea, East Timor | <b>KM014184</b> | <b>KM014228</b> | DQ238142        | -               |
| <i>Myzostoma attenuatum</i>               | SIO-BIC<br>A3715              | <i>Cenometra bella</i> ; (also <i>Petasometra</i> cf. <i>clarae</i> ; <i>Pontiometra andersoni</i> ) | Free-living | Madang, Bismarck Sea, Papua New Guinea                            | <b>KM014182</b> | <b>KM014227</b> | <b>KM014265</b> | <b>KM014307</b> |
| <i>Myzostoma australe</i>                 | SIO-BIC<br>A3813              | <i>Ptilometra macronema</i>                                                                          | Free-living | St. Francis Isle, Nuyts Archipelago, Southern Australia           | <b>KM014185</b> | <b>KM014229</b> | <b>KM014268</b> | <b>KM014309</b> |
| <i>Myzostoma bicorne</i>                  | SIO-BIC<br>A3812              | <i>Amphimetra tessellata</i>                                                                         | Free-living | Lizard Island Reef, Coral Sea, Australia                          | <b>KM014186</b> | <b>KM014230</b> | <b>KM014269</b> | <b>KM014310</b> |
| <i>Myzostoma bocki</i>                    | SIO-BIC<br>A3820              | <i>Tropiometra afra</i>                                                                              | Free-living | Kermadec Islands, Pacific Ocean, New Zealand                      | -               | -               | <b>KM014266</b> | <b>KM014308</b> |
| <i>Myzostoma capitocutis</i>              | ?/ SIO-BIC<br>A3696           | <i>Phanogenia typica</i>                                                                             | Free-living | Bismarck Sea, Papua New Guinea                                    | DQ238209        | DQ238177        | DQ238144        | <b>KM014311</b> |
| <i>Myzostoma cirriferum</i>               | ?                             | <i>Antedon bifida</i>                                                                                | Free-living | Morgat, Atlantic Ocean, France                                    | DQ238199        | DQ238170        | AF260585        | -               |
| <i>Myzostoma cuniculus</i>                | SAM<br>E3393/AM<br>W.43458    | <i>Clarkcomanthus mirabilis</i>                                                                      | Free-living | Lizard Island Reef (Coral Sea, Australia); Timor                  | DQ238203        | DQ238174        | DQ238138        | <b>KM014312</b> |
| <i>Myzostoma debiae</i>                   | SIO-BIC<br>A3794              | <i>Comactinia titan</i>                                                                              | Free-living | Raja Ampat, Indonesia                                             | <b>KM014210</b> | -               | <b>KM014291</b> | -               |
| <i>Myzostoma divisor</i>                  | SIO-BIC<br>A3216              | <i>Promachocrinus kerguelensis</i>                                                                   | Free-living | Shag Rocks, Antarctica                                            | <b>KM014188</b> | <b>KM014232</b> | <b>KM014271</b> | <b>KM014313</b> |
| <i>Myzostoma eeckhauti</i>                | SIO-BIC<br>A3668              | <i>Dichrometra/Lamprometra/Liparometra</i> sp. 1                                                     | Free-living | Madang, Bismarck Sea, Papua New Guinea                            | <b>KM014192</b> | <b>KM014236</b> | <b>KM014275</b> | <b>XXXX</b>     |
| <i>Myzostoma fissum</i>                   | ?                             | <i>Dichrometra flagellata</i> (likely <i>Dichrometra/Lamprometra/Liparometra</i> sp. 4)              | Free-living | Hansa Bay, Bismarck Sea, Papua New Guinea                         | DQ238208        | DQ238176        | AF260584        | -               |
| <i>Myzostoma</i> sp. aff. <i>furcatum</i> | SAM<br>E3394/SIO-BIC<br>A3805 | <i>Himerometra robustipinna</i>                                                                      | Free-living | Lizard Island Reef, Coral Sea, Australia                          | DQ238211        | DQ238178        | DQ238145        | <b>KM014315</b> |
| <i>Myzostoma fuscomaculatum</i>           | ?                             | <i>Tropiometra carinata</i>                                                                          | Free-living | False Bay, South Africa                                           | -               | FJ346828        | FJ346827        | -               |
| <i>Myzostoma hollandi</i>                 | SIO-BIC<br>A3791              | <i>Stephanometra tenuipinna</i>                                                                      | Free-living | Raja Ampat, Indonesia                                             | <b>KM014208</b> | -               | <b>KM014289</b> | -               |

Summers MM & Rouse GW (2014) Phylogeny of Myzostomida (Annelida) and their relationships with echinoderm hosts. *BMC Evolutionary Biology*.

|                                              |                               |                                                                                         |             |                                                                                                |                 |                 |                 |                 |
|----------------------------------------------|-------------------------------|-----------------------------------------------------------------------------------------|-------------|------------------------------------------------------------------------------------------------|-----------------|-----------------|-----------------|-----------------|
| <i>Myzostoma indocuniculus</i>               | SIO-BIC<br>A3763              | <i>Clarkcomanthus alternans</i>                                                         | Free-living | Raja Ampat, Indonesia                                                                          | <b>KM014209</b> | -               | <b>KM014290</b> | <b>KM014334</b> |
| <i>Myzostoma insigne</i>                     | SIO-BIC<br>A3802              | <i>Clarkcomanthus mirus</i>                                                             | Free-living | Lizard Island Reef, Coral Sea, Australia                                                       | <b>KM014191</b> | <b>KM014235</b> | <b>KM014274</b> | <b>KM014317</b> |
| <i>Myzostoma</i> sp. aff. <i>jaegersteni</i> | SIO-BIC<br>A3806              | <i>Dichrometra/Lamprometra/Liparometra</i> sp. 4                                        | Free-living | Lizard Island Reef, Coral Sea, Australia                                                       | <b>KM014202</b> | <b>KM014244</b> | -               | <b>KM014329</b> |
| <i>Myzostoma josefinae</i>                   | SIO-BIC<br>A3798              | <i>Psathyrometra fragilis</i>                                                           | Free-living | Monterey Canyon, California, USA                                                               | <b>KM014189</b> | <b>KM014233</b> | <b>KM014272</b> | <b>KM014314</b> |
| <i>Myzostoma kymae</i>                       | SIO-BIC<br>A3681              | <i>Alloeocomatella</i> n. sp.                                                           | Free-living | Madang, Bismarck Sea, Papua New Guinea                                                         | <b>KM014197</b> | -               | <b>KM014280</b> | -               |
| <i>Myzostoma</i> cf. <i>kymae</i>            | -                             | <i>Alloeocomatella pectinifera</i>                                                      | Free-living | Madang, Bismarck Sea, Papua New Guinea                                                         | <b>KM014204</b> | <b>KM014245</b> | <b>KM014286</b> | -               |
| <i>Myzostoma laingense</i>                   | ?/ SIO-BIC<br>A3816           | <i>Stephanometra indica</i>                                                             | Free-living | Hansa Bay, Bismarck Sea, Papua New Guinea (COI, 18S); Lizard Island Reef, Coral Sea, Australia | DQ238205        | -               | DQ238141        | <b>KM014318</b> |
| <i>Myzostoma laurenae</i>                    | SIO-BIC<br>A3809              | <i>Capillaster multiradiatus</i> s.l. A                                                 | Free-living | Lizard Island Reef, Coral Sea, Australia                                                       | <b>KM014198</b> | -               | <b>KM014281</b> | <b>KM014326</b> |
| <i>Myzostoma</i> cf. <i>laurenae</i>         | SIO-BIC<br>A3657              | <i>Capillaster multiradiatus</i> s.l. A; (also <i>Capillaster multiradiatus</i> s.l. B) | Free-living | Madang, Bismarck Sea, Papua New Guinea                                                         | <b>KM014203</b> | -               | <b>KM014285</b> | <b>KM014330</b> |
| <i>Myzostoma longitergum</i>                 | SIO-BIC<br>A3819              | <i>Comaster schlegelii</i> ; (also <i>Comaster audax</i> )                              | Free-living | Lizard Island Reef, Coral Sea, Australia                                                       | <b>KM014193</b> | -               | <b>KM014276</b> | <b>KM014319</b> |
| <i>Myzostoma miki</i>                        | SIO-BIC<br>A3834              | <i>Clarkcomanthus luteofuscum</i>                                                       | Free-living | Great Barrier Reef, Coral Sea, Australia                                                       | <b>KM014201</b> | <b>KM014243</b> | <b>KM014284</b> | <b>KM014328</b> |
| <i>Myzostoma mortenseni</i>                  | ?/SIO-BIC<br>A3784            | <i>Clarkcomanthus alternans</i>                                                         | Free-living | Hansa Bay, Bismarck Sea, Papua New Guinea (COI, 18S); Raja Ampat, Indonesia                    | DQ238206        | <b>KM014238</b> | DQ238142        | <b>KM014321</b> |
| <i>Myzostoma nigromaculatum</i>              | SIO-BIC<br>A3824              | <i>Phanogenia gracilis</i> type A; (also <i>Phanogenia typica</i> )                     | Free-living | Madang, Bismarck Sea, Papua New Guinea                                                         | <b>KM014195</b> | <b>KM014239</b> | <b>KM014278</b> | <b>KM014322</b> |
| <i>Myzostoma pipkini</i>                     | SAM<br>E3399/SIO-BIC<br>A3818 | <i>Colobometra perspinosa</i>                                                           | Free-living | Lizard Island Reef, Coral Sea, Australia                                                       | DQ238196        | DQ238167        | DQ238132        | <b>KM014306</b> |



Summers MM & Rouse GW (2014) Phylogeny of Myzostomida (Annelida) and their relationships with echinoderm hosts. *BMC Evolutionary Biology*.

|                                            |                     |                                                                          |                 |                                                                                                                                |                 |                 |                 |                 |
|--------------------------------------------|---------------------|--------------------------------------------------------------------------|-----------------|--------------------------------------------------------------------------------------------------------------------------------|-----------------|-----------------|-----------------|-----------------|
| <i>Myzostoma polycyclus</i>                | ?/ SIO-BIC<br>A3832 | <i>Comanthus parvicirrus</i>                                             | Free-<br>living | Hansa Bay,<br>Bismarck Sea,<br>Papua New Guinea<br>(COI, 16S, 18S);<br>Lizard Island Reef,<br>Coral Sea, Australia<br>Toliara, | DQ238202        | DQ238173        | DQ238137        | <b>KM014323</b> |
| <i>Myzostoma<br/>pseudocuniculus</i>       | ?                   | <i>Comanthus parvicirrus</i>                                             | Free-<br>living | Mozambique<br>Channel,<br>Madagascar                                                                                           | DQ238204        | DQ238175        | DQ238139        | -               |
| <i>Myzostoma<br/>seymourcollegiorum</i>    | ?/SIO-BIC<br>A3815  | <i>Cenolia trichoptera</i>                                               | Free-<br>living | Bicheno, Tasmania,<br>Australia                                                                                                | EF506562        | EF506562        | EF506559        | <b>KM014324</b> |
| <i>Myzostoma</i> cf.<br><i>stochoeides</i> | SIO-BIC<br>A3724    | <i>Comanthus gisleni</i> ; <i>Comanthus</i> sp. 4                        | Free-<br>living | Madang, Bismarck<br>Sea, Papua New<br>Guinea                                                                                   | <b>KM014196</b> | <b>KM014240</b> | <b>KM014279</b> | <b>KM014325</b> |
| <i>Myzostoma susanae</i>                   | SAM E3879           | <i>Comaster schlegelii</i>                                               | Free-<br>living | Lizard Island Reef,<br>Coral Sea, Australia                                                                                    | <b>KM014200</b> | <b>KM014242</b> | <b>KM014283</b> | <b>KM014327</b> |
| <i>Myzostoma tertiusi</i>                  | SIO-BIC<br>A3703    | <i>Cenometra bella</i> ; (also <i>Colobometra<br/>perspinosa</i> )       | Free-<br>living | Madang, Bismarck<br>Sea, Papua New<br>Guinea                                                                                   | <b>KM014206</b> | <b>KM014247</b> | <b>KM014288</b> | <b>KM014332</b> |
| <i>Myzostoma testudo</i>                   | SIO-BIC<br>A3828    | <i>Davidaster discoideus</i> ; (also <i>Davidaster<br/>rubiginosus</i> ) | Free-<br>living | Carrie Bow Cay,<br>Caribbean Sea,<br>Belize                                                                                    | <b>KM014194</b> | <b>KM014237</b> | <b>KM014277</b> | <b>KM014320</b> |
| <i>Myzostoma</i> cf. <i>viride</i>         | SIO-BIC<br>A3808    | <i>Comatella nigra</i> type B                                            | Free-<br>living | Lizard Island Reef,<br>Coral Sea, Australia                                                                                    | <b>KM014187</b> | <b>KM014231</b> | <b>KM014270</b> | -               |
| <i>Myzostoma</i> sp. A                     | -                   | <i>Phanogenia typica</i>                                                 | Free-<br>living | Madang, Bismarck<br>Sea, Papua New<br>Guinea                                                                                   | <b>KM014205</b> | <b>KM014246</b> | <b>KM014287</b> | <b>KM014331</b> |
| <i>Myzostoma</i> sp. B                     | SAM E3395           | <i>Phanogenia typica</i>                                                 | Free-<br>living | Lizard Island Reef,<br>Coral Sea, Australia                                                                                    | DQ238212        | DQ238179        | DQ238146        | -               |
| <i>Myzostoma</i> sp. C                     | SIO-BIC<br>A3827    | <i>Capillaster multiradiatus</i> s.l. B                                  | Free-<br>living | East Johor Strait,<br>Singapore                                                                                                | <b>KM014212</b> | -               | <b>KM014292</b> | <b>KM014336</b> |
| <i>Myzostoma</i> sp. D                     | SIO-BIC<br>A3814    | <i>Dichrometra/Lamprometra/Liparometra</i><br>sp. 2                      | Free-<br>living | Stradbroke Island,<br>Queensland,<br>Australia                                                                                 | <b>KM014199</b> | <b>KM014241</b> | <b>KM014282</b> | -               |
| <i>Myzostoma</i> sp. E                     | SIO-BIC<br>A3720    | Colobometridae sp.                                                       | Free-<br>living | Madang, Bismarck<br>Sea, Papua New<br>Guinea                                                                                   | <b>KM014207</b> | <b>KM014248</b> | -               | <b>KM014333</b> |

|                                                    |                        |                                                                     |                         |                                                   |                 |                 |                 |                 |
|----------------------------------------------------|------------------------|---------------------------------------------------------------------|-------------------------|---------------------------------------------------|-----------------|-----------------|-----------------|-----------------|
| <i>Myzostoma</i> sp. F                             | SIO-BIC<br>A3672       | <i>Oligometra serripinna</i> ; (also<br><i>Petasometra clarae</i> ) | Free-<br>living         | Madang, Bismarck<br>Sea, Papua New<br>Guinea      | <b>KM014190</b> | <b>KM014234</b> | <b>KM014273</b> | <b>KM014316</b> |
| <i>Myzostoma</i> sp. G                             | SIO-BIC<br>A3826       | <i>Heterometra crenulata</i>                                        | Free-<br>living         | East Johor Strait,<br>Singapore                   | <b>KM014211</b> | <b>KM014249</b> | -               | <b>KM014335</b> |
| <i>Notopharyngoides<br/>aruensis</i>               | SIO-BIC<br>A3817       | <i>Stephanometra indica</i>                                         | In<br>digestive<br>tube | Lizard Island Reef,<br>Coral Sea, Australia       | <b>KM014180</b> | <b>KM014225</b> | <b>KM014263</b> | -               |
| <i>Notopharyngoides<br/>platypus</i>               | SIO-BIC<br>A3811       | <i>Comaster audax</i> ; (also <i>Comaster<br/>schlegelii</i> )      | In cysts                | Lizard Island Reef,<br>Coral Sea, Australia       | <b>KM014181</b> | <b>KM014226</b> | <b>KM014264</b> | <b>KM014305</b> |
| <b>Protomyzostomatidae</b> Stummer-Traunfels, 1923 |                        |                                                                     |                         |                                                   |                 |                 |                 |                 |
| <i>Protomyzostomum<br/>lingua</i>                  | SIO-BIC<br>A3238       | <i>Gorgonocephalus chilensis</i>                                    | Internal                | Discovery Bank,<br>Antarctica                     | <b>KM014171</b> | <b>KM014215</b> | <b>KM014253</b> | <b>KM014296</b> |
| <i>Protomyzostomum<br/>roseus</i>                  | SIO-BIC<br>A3799       | <i>Asteronyx longifissus</i>                                        | Internal                | Monterey,<br>California, USA                      | <b>KM014172</b> | <b>KM014216</b> | <b>KM014254</b> | -               |
| <b>Pulvinomyzostomatidae</b> Jägersten, 1940       |                        |                                                                     |                         |                                                   |                 |                 |                 |                 |
| <i>Pulvinomyzostomum<br/>inaki</i>                 | SIO-BIC<br>A1408/A1579 | <i>Antedon</i> sp.                                                  | In mouth                | Jaco Scarp, Costa<br>Rica                         | <b>KM014173</b> | <b>KM014217</b> | <b>KM014255</b> | <b>KM014297</b> |
| <i>Pulvinomyzostomum<br/>messingi</i>              | SIO-BIC<br>A3800       | <i>Gephyrocrinus messingi</i>                                       | Free-<br>living         | Oregon                                            | <b>KM014174</b> | <b>KM014218</b> | <b>KM014256</b> | <b>KM014298</b> |
| <i>Pulvinomyzostomum<br/>pulvinar</i>              | ?                      | <i>Leptometra phalangium</i>                                        | In mouth                | Banyuls-sur-Mer<br>(Mediterranean Sea,<br>France) | DQ238180        | DQ238150        | DQ238114        | -               |

**AM**, Australian Museum, Sydney, Australia; **MNHN**, Museum national d'Histoire naturelle, Paris, France; **SAM**, South Australian Museum, Adelaide, Australia; **SIO-BIC**, Benthic Invertebrate Collection, Scripps Institution of Oceanography, La Jolla, CA.

Sequencing of fresh material suggests the following sequences currently available on Genbank and published in Lanterbecq et al. (2006) are erroneous, wholly or in part: **(18S)** –*Mesomyzostoma katoi* DQ238121 (has an erroneous insertion), *Protomyzostomum glanduliferum* DQ238148 (identical to partial fragments of *M. katoi*), *Protomyzostomum polynebris* DQ238149 (identical to partial fragments of *M. katoi*), *Asteromyzostomum* sp. DQ238147 (similar to *M. mortenseni*), *Myzostoma nigromaculatum* DQ238140 (similar to *Myzostoma coriaceum* – here considered sp. F, see below); **(COI)** *Myzostoma ambiguum* DQ23820 (similar to *M. mortenseni*).

Identifications are emended for the following Genbank entries: DQ238192, DQ238163, & DQ238128 – *Endomyzostoma clarki* (previously *Endomyzostoma tenuispinum*) all identical to *E. clarki* sequences; DQ238189, DQ238160, & DQ238125 – *Endomyzostoma clarki* (previously *Endomyzostoma* sp. 2) all identical to *E. clarki* sequences; DQ238191, DQ238162, & DQ238127 – *Eenymeenymyzostoma cirripedium* (previously *Endomyzostoma* sp. 3); DQ238212, DQ238179, & DQ238146 – *Myzostoma* sp. B (previously *Myzostoma coriaceum*); DQ238201, DQ238172, & DQ238136 – *Myzostoma polycyclus* (previously *Myzostoma toliarense*).

**Table S2. Summary of maximum parsimony and maximum likelihood analyses.**

| <b>Dataset</b>                                                  | <b>No. characters</b> | <b>No. parsimony informative sites</b> | <b>No. variable uninformative sites</b> | <b>No. of most parsimonious trees</b> | <b>Most parsimonious tree length</b> | <b>Best scoring maximum likelihood tree (-ln)</b> |
|-----------------------------------------------------------------|-----------------------|----------------------------------------|-----------------------------------------|---------------------------------------|--------------------------------------|---------------------------------------------------|
| <b>Myzostomida</b>                                              |                       |                                        |                                         |                                       |                                      |                                                   |
| COI                                                             | 621                   | 322                                    | 26                                      | 4                                     | 3676                                 | 14987.78                                          |
| COI -3 <sup>rd</sup> position removed                           | 414                   | 120                                    | 21                                      | 13006                                 | 833                                  | 47532.15                                          |
| 16S                                                             | 466                   | 233                                    | 40                                      | 464                                   | 1622                                 | 7318.92                                           |
| 16S Gblocked                                                    | 408                   | 208                                    | 40                                      | 208                                   | 1502                                 | 6831.37                                           |
| 18S                                                             | 1829                  | 352                                    | 138                                     | 116                                   | 1712                                 | 11436.89                                          |
| 18S Gblocked                                                    | 1678                  | 312                                    | 102                                     | 108                                   | 1447                                 | 10055.26                                          |
| H3                                                              | 449                   | 134                                    | 9                                       | 116                                   | 1114                                 | 5012.06                                           |
| H3 Gblocked                                                     | 335                   | 134                                    | 9                                       | 113                                   | 1114                                 | 4851.35                                           |
| <b>Hosts</b>                                                    |                       |                                        |                                         |                                       |                                      |                                                   |
| Full concatenated dataset                                       | 5472                  | 1477                                   | 487                                     | 4                                     | 7430                                 | 38387.23                                          |
| Concatenated dataset – no 3 <sup>rd</sup> positions and Gblocks | 4117                  | 879                                    | 394                                     | 18                                    | 3292                                 | 21198.34                                          |
| COI                                                             | 1062                  | 423                                    | 73                                      | 35                                    | 2906                                 | 13523.09                                          |
| COI -3 <sup>rd</sup> position removed                           | 708                   | 124                                    | 44                                      | 76353                                 | 483                                  | 3417.55                                           |
| 16S                                                             | 660                   | 326                                    | 74                                      | 6                                     | 1594                                 | 7580.28                                           |
| 16S Gblocked                                                    | 519                   | 258                                    | 55                                      | 16                                    | 1190                                 | 5902.19                                           |
| CytB                                                            | 768                   | 325                                    | 86                                      | 2                                     | 1729                                 | 8105.98                                           |
| CytB -3 <sup>rd</sup> position removed                          | 512                   | 112                                    | 64                                      | 24                                    | 497                                  | 2981.79                                           |

Summers MM & Rouse GW (2014) Phylogeny of Myzostomida (Annelida) and their relationships with echinoderm hosts. *BMC Evolutionary Biology*.

|              |      |     |     |     |     |         |
|--------------|------|-----|-----|-----|-----|---------|
| 18S          | 2201 | 145 | 142 | 225 | 362 | 5014.41 |
| 18S Gblocked | 1654 | 131 | 127 | 145 | 320 | 4053.67 |
| 28S          | 781  | 258 | 112 | 30  | 772 | 4597.97 |
| 28S Gblocked | 724  | 254 | 104 | 36  | 757 | 4456.87 |

| <b>Myzostomida</b>                                              |      |      |     |      |      |          |
|-----------------------------------------------------------------|------|------|-----|------|------|----------|
| <b>Reduced</b>                                                  |      |      |     |      |      |          |
| Full concatenated dataset                                       | 3343 | 1012 | 199 | 10   | 7751 | 36377.04 |
| Concatenated dataset – no 3 <sup>rd</sup> positions and Gblocks | 2835 | 759  | 156 | 31   | 4727 | 25292.33 |
| COI                                                             | 621  | 318  | 27  | 6    | 3398 | 13963.00 |
| COI -3 <sup>rd</sup> position removed                           | 414  | 118  | 20  | 9563 | 772  | 4025.87  |
| 16S                                                             | 466  | 218  | 40  | 18   | 1497 | 6797.35  |
| 16S Gblocked                                                    | 519  | 258  | 55  | 16   | 1228 | 6337.89  |
| 18S                                                             | 1807 | 342  | 123 | 324  | 1519 | 10502.53 |
| 18S Gblocked                                                    | 1678 | 304  | 96  | 12   | 1290 | 9308.28  |
| H3                                                              | 449  | 134  | 9   | 77   | 1110 | 4991.69  |
| H3 Gblocked                                                     | 335  | 134  | 9   | 77   | 1110 | 4829.42  |

**Table S3. GenBank accession numbers for hosts and non-myzosome annelid outgroups used in molecular analyses. New molecular data in bold.**

| Host Taxa                               | Voucher       | COI             | 16S             | CytB            | 18S      | 28S             |
|-----------------------------------------|---------------|-----------------|-----------------|-----------------|----------|-----------------|
| <b>Asteroidea</b>                       |               |                 |                 |                 |          |                 |
| <i>Labidiaster annulatus</i>            | GB            | -               | AY706154        | -               | AY935548 | DQ354297        |
| <b>Ophiuroidea</b>                      |               |                 |                 |                 |          |                 |
| <i>Gorgonocephalus chilensis</i>        | GB            | AB758812        | AB758495        | -               | AB758525 | -               |
| <i>Asteronyx longifissus</i>            | SIO-BIC E6108 | -               | <b>KM014337</b> | -               | -        | <b>KM014340</b> |
| <b>Hyocrinida</b>                       |               |                 |                 |                 |          |                 |
| <i>Gephyrocrinus messingi</i>           | SIO-BIC E5662 | <b>KM014350</b> | <b>KM014339</b> | -               | -        | <b>KM014342</b> |
| <b>Isocrinida</b>                       |               |                 |                 |                 |          |                 |
| <i>Endoxocrinus parrae</i>              | GB            | GU327840        | GU327875        | GU327909        | Z80951   | GU327947        |
| <i>Metacrinus cf. rotundus</i>          | GB            | KC626566        | KC626658        | -               | KC626752 | KC626846        |
| <i>Metacrinus levii</i>                 | GB            | GQ913322        | GU327877        | -               | KC626751 | GU327948        |
| <b>Antedonidae</b>                      |               |                 |                 |                 |          |                 |
| <i>Antedon bifida</i>                   | GB            | KC626510        | KC626604        | -               | KC626696 | KC626791        |
| <i>Antedon sp.</i>                      | SIO-BIC E4399 | <b>KM014345</b> | <b>KM014338</b> | <b>KM014343</b> | -        | <b>KM014341</b> |
| <i>Florometra mawsoni</i>               | GB            | KC626549        | KC626641        | -               | KC626735 | KC626829        |
| <i>Promachocrinus kerguelensis</i>      | GB            | DQ823276        | GU327886        | DQ823333        | GQ913342 | JQ340282        |
| <b>Comatulidae</b>                      |               |                 |                 |                 |          |                 |
| <i>Alloeocomatella pectinifera</i>      | GB            | GU327852        | GU327892        | GU327921        | -        | GU327961        |
| <i>Alloeocomatella n. sp.</i>           | GB            | KJ874980        | KJ875023        | KJ875162        | -        | KJ875199        |
| <i>Anneissia bennetti</i>               | GB            | GQ913314        | KJ875057        | KJ875190        | GQ913330 | KJ875236        |
| <i>Capillaster multiradiatus s.l. A</i> | GB            | KJ874982        | KJ875025        | KJ875163        | -        | KJ875201        |
| <i>Capillaster multiradiatus s.l. B</i> | GB            | KJ874984        | KJ875026        | KJ875164        | -        | KJ875251        |
| <i>Cenolia trichoptera</i>              | GB            | GU327854        | GU327894        | GU327922        | -        | GU327962        |
| <i>Clarkcomanthus albinotus</i>         | GB            | KJ874987        | KJ875035        | KJ875171        | GQ913328 | KJ875212        |
| <i>Clarkcomanthus alternans</i>         | GB            | KJ874993        | KJ875035        | KJ875171        | -        | KJ875212        |
| <i>Clarkcomanthus luteofuscum</i>       | GB            | KJ874989        | KJ875031        | KJ875168        | -        | KJ875208        |
| <i>Clarkcomanthus mirabilis</i>         | GB            | GQ913313        | KJ875039        | KJ875175        | GQ913329 | KJ875216        |
| <i>Clarkcomanthus mirus</i>             | GB            | KJ875016        | KJ875059        | KJ875192        | -        | KJ875239        |
| <i>Comactinia titan</i>                 | GB            | KJ874992        | KJ875034        | -               | -        | KJ875211        |
| <i>Comanthus gisleni</i>                | GB            | GU327856        | KJ875037        | KJ875173        | GU327935 | KJ875214        |
| <i>Comanthus parvicirrus</i>            | GB            | KJ874997        | KJ875040        | KJ875176        | -        | KJ875217        |
| <i>Comanthus cf. suavia</i>             | GB            | KJ875000        | KJ875043        | -               | -        | KJ875220        |
| <i>Comanthus sp. 4</i>                  | GB            | KJ874996        | KJ875038        | KJ875174        | -        | KJ875215        |

Summers MM & Rouse GW (2014) Phylogeny of Myzostomida (Annelida) and their relationships with echinoderm hosts. *BMC Evolutionary Biology*.

|                                                  |                                                  |                 |          |          |                |          |
|--------------------------------------------------|--------------------------------------------------|-----------------|----------|----------|----------------|----------|
| <i>Comaster audax</i>                            | GB                                               | KJ875002        | KJ875046 | KJ875181 | -              | KJ875223 |
| <i>Comaster schlegelii</i>                       | GB                                               | KJ875004        | KJ875048 | KJ875182 | GQ913333       | KJ875225 |
| <i>Comatella nigra</i> type A                    | GB                                               | GU327858        | GU327896 | GU327924 | -              | GU327965 |
| <i>Comatella nigra</i> type B                    | GB                                               | KJ875006        | KJ875050 | -        | -              | KJ875227 |
| <i>Davidaster discoideus</i>                     | GB                                               | KJ875012        | KJ875055 | KJ875188 | -              | KJ875233 |
| <i>Davidaster rubiginosus</i>                    | GB                                               | KJ875013        | KJ875056 | KJ875189 | -              | KJ875234 |
| <i>Phanogenia gracilis</i> sl. type A            | GB                                               | KJ875018        | KJ875062 | KJ875195 | -              | KJ875241 |
| <i>Phanogenia typica</i>                         | GB                                               | KJ875017        | KJ875061 | KJ875194 | -              | KJ875240 |
| <b>Mariametroidea</b>                            |                                                  |                 |          |          |                |          |
| <i>Amphimetra tessellata</i>                     | SAM K2028                                        | <b>KM014354</b> | -        | -        | -              | -        |
| <i>Basilometra boschmai</i>                      | SIO-BIC E6072                                    | <b>KM014346</b> | -        | -        | -              | -        |
| <i>Cenometra bella</i>                           | GB                                               | GU327851        | GU327890 | GU327920 | -              | GU327959 |
| <i>Colobometra perspinosa</i>                    | GB<br>MNHN IE-<br>2013-8040<br>SIO-BIC<br>E6036* | GQ913321        | GU327891 | GU327919 | GQ913338       | GU327960 |
| Colobometridae sp.                               | E6036*                                           | <b>KM014348</b> | -        | -        | -              | -        |
| <i>Dichrometra/Lamprometra/Liparometra</i> sp. 2 | SAM K2109                                        | <b>KM014355</b> | -        | -        | -              | -        |
| <i>Heterometra crenulata</i>                     | GB                                               | KC626554        | KC626646 | -        | KC626740       | KC626834 |
| <i>Himerometra robustipinna</i>                  | GB<br>MNHN-IE-<br>2013-8128<br>SIO-BIC<br>E5912* | GQ913326        | GU327898 | GU327925 | GQ913343       | GU327970 |
| <i>Dichrometra/Lamprometra/Liparometra</i> sp. 1 | SIO-BIC<br>E5912*                                | <b>KM014351</b> | -        | -        | -              | -        |
| <i>Dichrometra/Lamprometra/Liparometra</i> sp. 4 | GB<br>MNHN-IE-<br>2013-8101<br>SIO-BIC<br>E6034* | GQ913319        | GU327900 | GU327927 | GQ913335       | GU327972 |
| <i>Oligometra serripinna</i>                     | E6034*                                           | <b>KM014352</b> | -        | -        | -              | -        |
| <i>Petasometra clarae</i>                        | SIO-BIC 6071                                     | <b>KM014347</b> | -        | -        | -              | -        |
| <i>Pontiometra anderson</i>                      | SIO-BIC E6070                                    | <b>KM014344</b> | -        | -        | -              | -        |
| <i>Stephanometra indica</i>                      | GB                                               | GQ913320        | -        | -        | GQ913336<br>-7 | GU327973 |
| <i>Stephanometra tenuipinna</i>                  | SIO-BIC E5842                                    | <b>KM014353</b> | -        | -        | -              | -        |
| <b>Ptilometridae</b>                             |                                                  |                 |          |          |                |          |
| <i>Ptilometra macronema</i>                      | GB                                               | GU327866        | GU327903 | -        | -              | GU327976 |
| <b>Tropiometridae</b>                            |                                                  |                 |          |          |                |          |
| <i>Tropiometra afra</i>                          | GB                                               | GU327867        | GU327906 | GU327928 | -              | GU327978 |
| <b>Zenometridae</b>                              |                                                  |                 |          |          |                |          |
| <i>Psathyrometra fragilis</i>                    | GB                                               | GU327865        | GU327905 | -        | -              | -        |

**Host Outgroups**

|                             |    |          |          |          |          |          |
|-----------------------------|----|----------|----------|----------|----------|----------|
| <i>Asterias amurensis</i>   | GB | AB183559 | AB183559 | AB183559 | D14358   | -        |
| <i>Ophiopholis aculeata</i> | GB | AF314589 | DQ297105 | AF314589 | DQ060806 | DQ029078 |

**Annelid Outgroups**

|                              |    |          |          |   |          |   |
|------------------------------|----|----------|----------|---|----------|---|
| <i>Nereis pelagica</i>       | GB | JN852947 | AY340470 | - | AF474279 | - |
| <i>Glycera alba</i>          | GB | JN852946 | DQ779615 | - | AY176287 | - |
| <i>Bhawania heteroseta</i>   | GB | EU555053 | EU555044 | - | EU555035 | - |
| <i>Harmothoe imbricata</i>   | GB | AY839580 | AY340463 | - | AY340434 | - |
| <i>Chloeia flava</i>         | GB | JN852944 | JN852917 | - | EF076780 | - |
| <i>Phyllodoce maculata</i>   | GB | AY839586 | -        | - | AY176302 | - |
| <i>Eusyllis blomstrandii</i> | GB | EF123749 | EF123788 | - | EF123887 | - |

**MNHN**, Museum national d'Histoire naturelle, Paris, France; **SAM**, South Australian Museum, Adelaide, Australia; **SIO-BIC**, Benthic Invertebrate Collection, Scripps Institution of Oceanography, La Jolla, CA.
